# Supplementary material for: A logical network-based drug-screening platform for Alzheimer’s disease representing pathological features of human brain organoids
Source: PubMed Central journal article supplement (PMC7804132; doi:10.1038/s41467-020-20440-5), 2021-01-12
Supplement: 41467_2020_20440_MOESM4_ESM.pdf [file 41467_2020_20440_MOESM4_ESM.pdf]

Reviewers' Comments:

Reviewer #1:

Remarks to the Author:

The manuscript by Park et al. describes results from work that integrates mathematical modeling predictions regarding combinatorial drug targets and testing these predictions in iPSC-derived cerebral organoids as a high-content drug screening system.

There are many positive aspects of the manuscript, and overall I am very enthusiastic about the presented results. The manuscript is very well written, easy to follow, and the presented results can be of broad scientific interest. The development of a high-throughput drug screening system that incorporates advanced organoid systems and mathematical modeling is a substantial strength. While I imagine this workflow can test new molecules, inhibitors, etc., its more exciting aspect lies in the ability to screen already approved drugs for new clinical indications quickly, thus reducing the cost and time to new potential treatments.

However, I believe several areas of concern are essential to address to improve the manuscript and interpretation of the results prior to acceptance.

\* Research reproducibility of the modeling results: While the Boolean functions of the model are available as plain text in the Supplementary Excel file, the model should be shared in the SBML-qual format (PMID: 24321545) to make it easier for others to reproduce the presented research, and to further expand the model. At a minimum, this SBML file should be available as part of this manuscript. Better would be making the model available in any or all of existing Boolean model repositories (e.g., BioModels (which has been supporting Boolean models for a while now; PMID: 29106614 ), GINsim.org, Cell Collective; PMID: 22871178).

\* Related to reproducibility, I don't believe the methods for the modeling component are comprehensive enough. For example, what initial state(s) did the authors use for the quality control input-output analyses (Fig. 5 and Fig. 5-1), and the actual predictions? Did the authors perform initial condition sensitivity analysis?

\* For the oxidative stress input-output analyses: what activity levels were used for other external variables (e.g., Reelin, APOE4, etc.)? Did the authors do these analyses for multiple external conditions?

\* It is not clear how oxidative stress ("ROS") in the model was used for input-output analyses with varying activity levels, because the model (Fig 4 and Excell file) shows that several other model components regulate ROS -- in other words, it is not an independent variable (input) that could be easily used for input-output analyses.

\* The authors did an excellent job annotating the model with citations specific to the model components' interactions. This level of annotations will aid in the transparency of the model. For readability issues, can the authors replace the PMIDs in all supplementary documents with actual citations and references?

\* In addition to providing more details about the modeling methodology and model/simulation set-up, it would be helpful if the authors included citations to offer readers with options further to dive even deeper into Boolean/logical modeling. Examples of more recent reviews on the topic include PMID: 27303434, 32313939, etc. BoolNet should be cited (PMID: 20378558). Finally, the input-output analysis of the model leverages the conversion of the binary input/output of Boolean networks into semi-continuous Activity Levels and "%ON" concepts originally developed in Helikar et al., 2008. As such, it might be appropriate to cite the work.

\* Some of the figures are very complex, making them hard to read without zooming in

significantly (Fig 6 is the least readable)

A few questions on the drug effect work/results:

- \* For the drug effect studies, can the authors please more clearly explain what was/were the control(s)?
- \* How many replicates were used?
- \* How did the authors select the drug concentrations?
- \* Why did the authors use 24h for the drug treatment? Did the analysis post-treatment happen at the 24-hour mark, or was it later? Why not use 48 or 72 hours?

Minor concerns:

- \* Line 45: remove "the" before precision medicine
- \* Line 50: remove "the" before symptoms
- \* Line 76: "in vitro" should be italicized
- \* Line 99: "Mathematic" should be "Mathematical"
- \* Line 128: Missing "genes" from "differentially expressed genes (DEG) patterns"
- \* Line 197: Remove "comprehensive" -- while the model is not a "toy model," comprehensive is a relative term, and I don't believe this model is comprehensive (for example many other pathways known to interact with the modeled pathways could be included). Perhaps "relevant" is a more appropriate word?
- \* Line 313: Similar to above, I recommend removing "the whole" because the model does not include the entire interaction network
- \* Line 321: "was focusing" does not seem grammatically correct; perhaps change to "was to focus on.."?
- \* Line 333: remove "but"

Best wishes,

Tomas Helikar

Reviewer #2:

Remarks to the Author:

This manuscript entitled "A network-based drug-screening platform for Alzheimer's disease by integrating mathematical modeling and pathological features of human brain organoids" describes a network-based drug-screening platform developed by integrating mathematical modeling and the pathological features of Alzheimer's disease (AD) with human iPSC-derived cerebral organoids. Basic idea of this manuscript is a novel and interesting in developing drug-screening for Alzheimer's disease.

However, authors should clearly describe their methods in construction of AD molecular network. How did they narrow genes/proteins/phenotypes down to only 77 genes/proteins/phenotypes? It appears to be an arbitrary choice. At least, AlzPathway consists of 1,347 species (genes and proteins) and 129 phenotypes. Authors need to explain the reason why they focus on MAPK signaling pathway, WNT signaling pathway, and PI3K-AKT signaling pathway as molecular regulatory network of AD (Fig. 4A) which is a basis for network analysis in this manuscript. By the way, Fig. 4A is the correct figure? For example, Reelin has relationships with not only Apoer2 but also VLDLR and Apoptosis according to a logic table (Supplementary Table 2).

Authors also should clearly describe their methods in analysis of the AD network model and identification of candidate drugs. For example, Fig. 5A illustrates up-regulated and down-regulated pathways according to their perturbation analysis, but they did not explain the definition of "up-regulated" and "down-regulated" pathways, and they did not show their results of perturbation analysis. Authors also should clearly describe their methods of attractor landscape analysis and unfortunately attractor landscape drawn in Figure 5B is too small to see.

By the way, the idea of phenotype score is interesting to estimate the pathological level, but there are several concerns. Authors choose key proteins and phenotypes such as A $\beta$ , p-tau, synapse loss, apoptosis, and autophagy for calculation of phenotype score, but how to choose these key proteins and phenotypes? Phenotype score looks work well but p-tau proteins have double impact on the score because p-tau activates synapse loss. They developed a network model but they did not consider these kinds of network effects in the calculation of phenotype score. If phenotype score well works to estimate the pathological level, why did they need to develop a network model and conduct a perturbation analysis? Why don't authors directly conduct the phenotype score calculation?

Basic idea of this manuscript is a novel and interesting in developing drug-screening for Alzheimer's disease, but they need to clearly describe their methods and results.

Reviewer #3:

Remarks to the Author:

This is an interesting paper in which Park et al. first generate a cerebral organoid (CO) model of Alzheimer's disease (AD) through two complementary approaches: (1) using patient derived iPSCs (PiB+ iCOs) and (2) using isogenic iPSC lines with a CRISPR-edited apoE  $\epsilon$ 4 allele (E4iso iCOs).

They do an in-depth characterization of their AD organoids to show that they recapitulate some key pathological phenotypes of the disease, which are absent in other in-vitro models. Finally, they use computational modeling of known AD pathways to narrow down a list of candidate targets, which are selected using mathematical modelling, for testing FDA-approved drugs. They attempt to validate these in some of their models.

While an innovated and much appreciated approach, there are some critical areas of Improvement:

1) Data presented in Figure 3. Localization of the plaques could be clearer, especially the subcellular localization. Perhaps could be complemented by alternate imaging methods that show this key property of the model at higher resolution.

2) Data presented in Figure 4. Potentially move oxidative stress validation to supplemental.

3) Data presented in Figure 6. Park et al. tested FDA-approved drugs on both LPLA288T SNP PiB+ iCOs and E4iso iCOs as a validation of their network-based drug screening platform. Results of the validation experiments were not entirely conclusive due in part to lack of a clear dose-dependent relationship. These results therefore would require further validation, potentially by testing with more replicates and in the other cell lines. Drug testing was not performed on PiB+ iCOs that contain the ApoE  $\epsilon$ 4 allele. In addition to LPLA288T SNP PiB+ iCOs only representing a small subset of the iCOs used in this study as this SNP is not present in other PiB+ iCOs, these iCOs also do not carry the ApoE  $\epsilon$ 4 allele. Furthermore, although E4iso iCOs were used for drug testing, they are not derived from AD patient iPSCs. Thus, to properly validate their model for precision medicine applications, FDA-approved drugs need to also be tested on PiB+ iCOs that carry the ApoE  $\epsilon$ 4 allele. These COs better represent the genetic background of human sporadic AD patients than E4iso iCOs, while also carrying the ApoE  $\epsilon$ 4 allele missing in the LPLA288T SNP PiB+ iCOs.

While I appreciate the unique aspect the mathematical model brings to the paper, I also felt the flow of the paper would be much improved if this was more concisely summarized in the main text.

Reviewer #4:

Remarks to the Author:

The manuscript submitted describes a high-content drug-screening platform (HCS) that uses human iPSC-derived cerebral organoids (iCOs) in order to identify Alzheimer's disease (AD) drug candidates. For this purpose, pluripotent stem cells (iPSC) derived from participants were used that had been selected on the basis of the presence or absence of pathological features of AD or the ApoE4 genotype. In addition to the use of iCO's from participants with preclinical sporadic AD, a molecular regulatory network model for AD was developed and integrated in order to filter suitable candidates from a library of FDA-approved drugs, the efficacy of which was then tested in the HCS-system.

From a technical point of view the described platform contains a couple of interesting and important new features that might help to overcome some of the present limitations in the use of organoids for high-content drug screening purposes. One of them is a stringent emphasis on quality control with respect to producing a large number of homogenous well shaped and evenly sized iCO's. Demonstrating the feasibility of obtaining such iCOs will be relevant for many other applications of organoids and of interest to others in the community.

The selection and comparison of iCO's from participants with or without a high burden of A $\beta$ , total tau and phosphorylated tau deposits, is also an important element of the screening platform presented, providing a potentially more relevant disease model for sporadic AD than those available so far.

Furthermore, the integration of a molecular regulatory network model for AD into the screening platform is put forward by the authors as another key innovative element that will facilitate the identification of suitable drug candidates. The approach nicely exploits multiple sources of information: It takes both gene expression data from iPSC models and prior knowledge from curated AD pathways into consideration, and also prefilters the candidate drugs by removing those that do not pass the blood-brain barrier (BBB).

However, it is not clear that the network analysis in this approach provides much additional and robust filtering information for the candidate drug selection: Instead of performing an unbiased genome-scale network analysis, the authors have already pre-selected a network of only 77 nodes with well-known functional AD associations, mainly from existing curated AD pathways in KEGG AlzPathway. This limits the selection of candidate drug targets significantly - the 77 nodes cover already well-studied AD protein targets, and due to this pre-selection, a subset of them will always be chosen as candidate targets, independent of the observed alterations in the iPSC transcriptomics data.

The known drug associations of these 77 nodes, and the drug BBB-filter will further reduce the number of candidate targets and compounds, again independent of the content of the iPSC data. Thus, before applying any network analysis, the drugs are already pre-filtered to those that have previously been described to target the known AD-associated proteins in the AlzPathway map or the KEGG Alzheimer pathway and that pass the BBB. These will all be reasonable candidate drugs, but with limited novelty.

The network analysis is used as an additional filter to further reduce the candidate drug selection, but it is unclear whether it provides significant and robust filtering information beyond the previous generic filters. The two main reasons why there are doubts regarding the robustness and reliability of this additional filtering step are outlined in the comments 1) and 2) below: The small number of RNA-seq experiments limits the statistical power, the transcriptomics data comes from only 11 participants, which may lead to subject-specific idiosyncrasies (1), and the manuscript suggests that the significance scores to determine the differentially expressed genes may not have not been adjusted for multiple hypothesis testing and/or a relaxed p-value cut-off was used.

## Main comments:

1.) One limitation is that the data comes from only 11 participants. The data for these subjects may not be representative for the overall population of sporadic AD patients, and subject-specific idiosyncrasies in the data that are not disease-relevant could lead to errors in the transcriptome-based network model and perturbation analysis. The authors mention that they aim at a personalized precision medicine approach, but the distinction between disease-associated biological variance and other sources of variance in the data is still an issue with small numbers of subjects, and small numbers of RNA-seq experiments limiting the statistical power, in particular for the transcriptome-derived network analysis. It is therefore recommended to compare the data against larger public iPSC data for AD, e.g. derived from the GEO database for the transcriptomic analyses.

2.) It is not clear whether the p-values that were used to define the differentially expressed genes (DEGs) were adjusted for multiple hypothesis testing. Using a relaxed p-value cut-off for the pathway analysis ( $-\log_{10}(\text{p-value}) > 1$ , corresponding to a p-value cut-off of 0.1) can be justified by taking into consideration that pathways with an enrichment of many small, close-to-significant alterations are likely disease-relevant. However, since the authors do not only aim at ranking GO processes, but also at identifying individual drug target genes, a false-discovery-rate (FDR) above 10% for individual genes would lead to too many errors (in particular, if the authors did not use FDR-adjusted p-values, but nominal p-values). Therefore, FDR corrected p-values should be used for all analyses that rely on the significance of individual gene alterations.

3) The authors state that the pre-selected network consists of 77 nodes and 203 links. While these nodes representing mainly genes/proteins from KEGG and AlzPathway definitely play important roles in AD, a significantly larger number of genes/proteins will likely be relevant for AD than this pre-filtered subset, and the restriction to mostly KEGG/AlzPathway-derived nodes may bias the results towards target genes in these pathways that are already well-known and whose associated drugs therefore have limited novelty. A possibility to avoid this limitation is to use a pathway-agnostic network analysis (e.g. using a genome-scale network from the STRING web-service or other public resources for genome-scale gene regulatory or protein interaction networks) to identify network clusters of transcriptomic alterations, which are not already captured by the known pathway definitions.

4) To show that the mathematical modeling / network analysis provides a significant added value beyond the compound filtering obtained from the network model pre-selection of 77 nodes and the BBB-filter, it would be useful to compare the ranked target and compound lists with and without the additional network analysis (e.g. testing whether there is an improved enrichment of known AD protein drug targets, such as BACE1, MAOB, MAPT etc., that have been considered in AD clinical trials, in the network analysis derived ranking list).

In summary, the current manuscript describes the use of a drug screening platform that overcomes some of the limitations of current iPSC/iCO human disease models and is of potential interest beyond AD. However, it does not provide sufficient information to show that network analysis improves the filtering significantly beyond what is already achieved by the prior generic filtering steps. Some possibilities to adjust the analysis workflow (e.g. by using a genome-scale network analysis approach) are suggested.

1 **Response to the Reviewers' Comments and Summary of Changes**

2

3 **\*To reviewers: The Line numbers are based on the automatically-converted pdf**  
4 **file not the original manuscript word File (.docx).**

5

6 **Response to the specific comments of Reviewer 1:**

7

8 **[COMMENT #1]**

9 Research reproducibility of the modeling results: While the Boolean functions of the  
10 model are available as plain text in the Supplementary Excel file, the model should be  
11 shared in the SBML-qual format (PMID: 24321545) to make it easier for others to  
12 reproduce the presented research, and to further expand the model. At a minimum, this  
13 SBML file should be available as part of this manuscript. Better would be making the  
14 model available in any or all of existing Boolean model repositories (e.g., BioModels  
15 (which has been supporting Boolean models for a while now; PMID: 29106614),  
16 GINsim.org, Cell Collective; PMID: 22871178).

17 **[RESPONSE]**

18 Following the reviewer's comment, we have converted our Boolean model to SBML-  
19 qual format, and the SBML file is available at [[https://github.com/syjang-](https://github.com/syjang-SBiE/Alz_neuron_network)  
20 [SBiE/Alz\\_neuron\\_network](https://github.com/syjang-SBiE/Alz_neuron_network)] (see 'Methods – Mathematical modeling' of the revised  
21 manuscript for details, **line 631-632**). The Boolean functions of our model were written  
22 in accordance with the BoolNet format, and they have been converted to SBML-qual  
23 format using BioLQM v0.6.1. As soon as our paper is accepted, we will add detailed  
24 annotations to our model and upload its SBML file to the existing Boolean model  
25 repositories such as BioModels, GINsim.org, CellCollective by referencing our study.

26

27 **[COMMENT #2]**

28 Related to reproducibility, I don't believe the methods for the modeling component are  
29 comprehensive enough. For example, what initial state(s) did the authors use for the  
30 quality control input-output analyses (**Fig. 5 and Fig. 5-1**), and the actual predictions?  
31 Did the authors perform initial condition sensitivity analysis?

32 **[RESPONSE]**

33 For the quality control input-output analyses (**Supplementary Fig. 7-1, 7-2**), the initial  
34 state of all but three nodes were set to zero: the value of 'ROS' node was set according  
35 to input conditions and the values of 'APOE4' and 'LPL' were fixed depending on the  
36 given genetic conditions. For given genetic conditions, qualitative input-output analysis  
37 was performed for all 1,000 input levels of 'ROS' between 0% and 100% over 0.1%  
38 increment. For each input level, the Boolean network simulation was conducted over  
39 1,000-time steps. Each node's state value during the last 300-time steps were tracked,  
40 and the average node state value in this period was taken as the 'average node activity'.

41 For the actual prediction (**Fig. 5**), we used the ‘getAttractors’ function in the  
42 ‘BoolNet’ package. Due to the high computational cost of simulating all initial states,  
43 we randomly sampled one million initial states. We confirmed that the main results  
44 were not sensitive to the randomly selected initial states through repeated sampling  
45 processes. The function’s ‘method’, ‘type’ parameters were set to ‘random’ and  
46 ‘synchronous’, respectively to find attractors. We also used ‘genesON’ and ‘genesOFF’  
47 parameters of the function to simulate genetic conditions and perturbations.

48 Following the reviewer’s comment, we have further performed initial condition  
49 sensitivity analysis of the input-output analyses. From the total of 77 nodes, a certain  
50 number of nodes except ‘ROS’, ‘APOE4’ and ‘LPL’ have been randomly selected and  
51 given an initial state value of ‘1’ and the others have been set to ‘0’. The number of  
52 selected nodes has been set from 10 to 70 with 10 nodes interval, and the input-output  
53 analysis has been performed for these randomly generated initial state values. The  
54 average node activities obtained from this analysis have been compared with the  
55 previous results using the ‘pcc’ function of the ‘sensitivity’ R package. We have set the  
56 value of the ‘nboot’ parameter of the function to 100. The results of this initial condition  
57 sensitivity analysis of our Boolean model have all showed Pearson correlation  
58 coefficients of 1. This is because, when we fixed the value of ‘APOE4’ or ‘LPL’ node  
59 for given genetic conditions, all initial states of each simulation trial have converged to  
60 only one attractor. Consequently, we have confirmed that the results of input-output  
61 analyses are not affected by initial conditions. We have added the aforementioned  
62 description to ‘Input-output relationships of the network model’ in ‘Methods’ of the  
63 revised manuscript (**line 658-670**).

64

### 65 **[COMMENT #3]**

66 For the oxidative stress input-output analyses: what activity levels were used for other  
67 external variables (e.g., Reelin, APOE4, etc.)? Did the authors do these analyses for  
68 multiple external conditions?

### 69 **[RESPONSE]**

70 In our study, ‘APOE4’ was the only external variable considered in this network model.  
71 ‘APOE4’, which stands for Apolipoprotein isoform 4, is a well-known risk factor of  
72 Alzheimer’s disease<sup>1</sup>. The activity level of ‘APOE4’ was set to have a value of ‘0’ or ‘1’,  
73 depending on the given genetic condition. If APOE isoform is  $\epsilon 4$  allele, the activity  
74 level of ‘APOE4’ was fixed to have a value of ‘1’, otherwise it was fixed to have a  
75 value of ‘0’. For the case of ‘Reelin’, we found that the negative link from ‘Apoptosis’  
76 was accidentally missing in the process of visualizing the Boolean model from the  
77 original logic table. The relationship between ‘Reelin’ and ‘Apoptosis’ was enlisted as  
78 ‘Reelin = !Apoptosis’ in the original **Supplementary Table 2** and was used in all  
79 processes of obtaining simulation results. In the revised manuscript, we have updated  
80 the figure for our Boolean model (**Fig. 4**) in accordance with the original logic table  
81 (**Supplementary Table 2**).

82

83 **[COMMENT #4]**

84 It is not clear how oxidative stress ("ROS") in the model was used for input-output  
85 analyses with varying activity levels, because the model (**Fig. 4 and Supplementary**  
86 **Table 2**) shows that several other model components regulate ROS -- in other words, it  
87 is not an independent variable (input) that could be easily used for input-output analyses.

88 **[RESPONSE]**

89 In our study, oxidative stress ('ROS') was used as an input to describe the effects of  
90 aging, which is a major risk factor of Alzheimer's disease that increases pathological  
91 protein levels (i.e. beta-amyloid, p-tau, etc.)<sup>2</sup>. However, because biological evidence  
92 that ROS is produced by beta-amyloid or Ca<sup>2+</sup> ion exists, the regulatory interactions  
93 directed to ROS could not be ruled out in our model<sup>3</sup>. Thus, as the reviewer pointed out,  
94 ROS is not strictly an independent variable in our model. Despite this issue, we used  
95 ROS as an independent variable to analyze the changes of output node states for fixed  
96 initial ROS levels only for input-output analysis.

97

98 **[COMMENT #5]**

99 The authors did an excellent job annotating the model with citations specific to the  
100 model components' interactions. This level of annotations will aid in the transparency  
101 of the model. For readability issues, can the authors replace the PMIDs in all  
102 supplementary documents with actual citations and references?

103 **[RESPONSE]**

104 Following the reviewer's comment, we have revised the manuscript by replacing the  
105 PMIDs in all supplementary documents with actual citations and references.

106

107 **[COMMENT #6]**

108 In addition to providing more details about the modeling methodology and  
109 model/simulation set-up, it would be helpful if the authors included citations to offer  
110 readers with options further to dive even deeper into Boolean/logical modeling.  
111 Examples of more recent reviews on the topic include PMID: 27303434, 32313939, etc.  
112 BoolNet should be cited. Finally, the input-output analysis of the model leverages the  
113 conversion of the binary input/output of Boolean networks into semi-continuous  
114 Activity Levels and "%ON" concepts originally developed in Helikar et al., 2008. As  
115 such, it might be appropriate to cite the work.

116 **[RESPONSE]**

117 Following the reviewer's comment, we have cited the latest review papers on  
118 Boolean/logical modeling in the revised manuscript (**line 618-619**). A citation for the  
119 BoolNet package has also been added (**line 627-631**). Finally, a citation for the Helikar  
120 et al., 2008 has also been added to the 'Methods' section of the revised manuscript, so  
121 that appropriate citation for the previous study is made (**line 648**).

122



123 [COMMENT #7]

124 Some of the figures are very complex, making them hard to read without zooming in  
125 significantly (Fig. 6 is the least readable)

126 [RESPONSE]

127 We have increased the font size on our figures and especially modified Fig. 6. The  
128 graph type has been changed in order that the medicinal effects can be seen well at a  
129 glance (all of the cell viability data have moved to Supplementary Fig. 11. Instead,  
130 PiB<sup>+</sup> #5 iCOs data were added in the Fig. 6 according to the Reviewer 4's comment).

131

132 [COMMENT #8]

133 For the drug effect studies, can the authors please more clearly explain what was/were  
134 the control(s)?

135 [RESPONSE]

136 No drug treatment groups (we call them as 'vehicle group'; Veh) were used as control  
137 groups. Since our drug powders were initially diluted in DMSO or distilled water (DW)  
138 to make them dissolve, iCOs of Veh groups receive a treatment with appropriate amount  
139 of DMSO or distilled water (DW) (the same volume of solution used to make drug  
140 dissolve) that do not contain drugs meant to affect iCOs. The detailed methods for the  
141 drug treatment were added to the 'Drug treatment' section which is described in the  
142 Methods section (line 521-526).

143

144 [COMMENT #9]

145 How many replicates were used?

146 [RESPONSE]

147 Six replicates (individual iCOs) per each drug dose were performed. We also mentioned  
148 it in the 'Drug treatment' section in the Methods section (line 526-527).

149

150 [COMMENT #10]

151 How did the authors select the drug concentrations?

152 [RESPONSE]

153 Since our drug candidates were subjected to drug repositioning, they had mainly been  
154 tested for applications in fields other than neurodegenerative disorders. Most of the  
155 references used cell types different from neurons. We could hardly find any studies  
156 treating the drugs on brain organoids as it is a relatively novel and unconventional  
157 method in drug screening. Consequently, we referred to studies using the drugs in *in*  
158 *vitro* application and optimized for our system by testing the dosage range that includes  
159 the optimal level suggested by the references.

160 When setting the dosage range, we had two points into consideration. Firstly, a lower  
161 dosage limit should be tested to observe the potential neurotoxic effects of the drugs.  
162 Responsiveness to drugs might differ according to cell types, and iPSC-derived neurons,  
163 which resemble primary cells, could be more vulnerable to a higher concentration than

164 conventional cell lines. Secondly, the fact that brain organoids are three-dimensional  
165 aggregates of interconnected neurons with complex cytoarchitecture and extracellular  
166 matrix should be considered. These might serve as barriers to simple diffusion of drugs  
167 and induce essentially different drug penetration dynamics and subsequent uptake by  
168 cells compared to conventional monolayer culture. It led us to test the upper  
169 concentration limit as equal to or higher than the references.

170 For example, Ripasudil, which is approved for glaucoma and ocular hypertension  
171 treatment, has been treated at a concentration of 10  $\mu\text{M}$  on human corneal endothelial  
172 cells on the previous studies<sup>4,5</sup>; we tested various conditions ranging from 0.25  $\mu\text{M}$  to  
173 10  $\mu\text{M}$  to account for potential neurotoxicity. Everolimus, an mTOR inhibitor, has been  
174 treated on human coronary artery endothelial cells at 0.5  $\mu\text{M}$ <sup>6</sup>, and on A-498 and Caki-1  
175 cell lines at 1  $\mu\text{M}$ <sup>7</sup>. Thus, we set a dosage range spanning from 0.25  $\mu\text{M}$  to 5  $\mu\text{M}$  that  
176 can include the optimal dosage level indicated by the references. After setting the  
177 concentration range to be tested, we further validated it by MTT assay to observe its  
178 influence on cell viability. Although the drug effects were trivial on enhancing cell  
179 viability, we could not observe any harmful effects induced by the drugs at our treated  
180 doses.

181  
182

### 183 [COMMENT #11]

184 Why did the authors use 24h for the drug treatment? Did the analysis post-treatment  
185 happen at the 24-hour mark, or was it later? Why not use 48 or 72 hrs?

### 186 [RESPONSE]

187 Although the 'Veh' groups (used as controls whereas the treatment groups were used as  
188 cases) were not treated with the drugs, they were simultaneously grown in the opti-  
189 MEM media, which is not suitable for the permanent cell culture of iCOs, during the  
190 treatment of drugs with other iCOs. We thought the best time point will be that of  
191 'showing a natural tendency of cell death but not too much'. We speculated 48 or 72h  
192 (>24h) may be too long for the drug test because the 'Veh' groups also can show  
193 excessive loss of neuronal cells (might be called as 'cell senescence') even without the  
194 drugs. As expected, the Veh group showed statistically significant loss of their own cell  
195 viability from 48h timepoint (reference figure below). So, we decided to use 24h  
196 timepoint for the drug treatment.

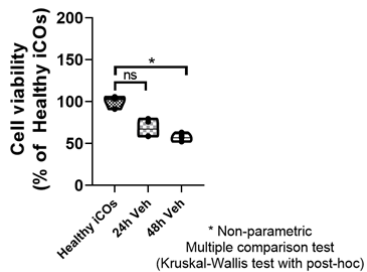

197  
198

<Reference figure for COMMENT #11>

199 **[COMMENT #12: Minor concerns]**  
200 \* Line 45: remove "the" before precision medicine/ \* Line 50: remove "the" before  
201 symptoms/ \* Line 76: "in vitro" should be italicized/ \* Line 99: "Mathematic" should be  
202 "Mathematical"/ \* Line 128: Missing "genes" from "differentially expressed genes  
203 (DEG) patterns"/ \* Line 197: Remove "comprehensive" -- while the model is not a "toy  
204 model," comprehensive is a relative term, and I don't believe this model is  
205 comprehensive (for example many other pathways known to interact with the modeled  
206 pathways could be included). Perhaps "relevant" is a more appropriate word/ \* Line 313:  
207 Similar to above, I recommend removing "the whole" because the model does not  
208 include the entire interaction network /\* Line 321: "was focusing" does not seem  
209 grammatically correct; perhaps change to "was to focus on."?/ \* Line 333: remove "but"  
210 **[RESPONSE]**  
211 We corrected all of them. Thanks for the kind and detailed comments.  
212  
213

214 **Response to the specific comments of Reviewer 2:**

215

216 **[COMMENTS]**

217 This manuscript entitled “A network-based drug-screening platform for Alzheimer’s  
218 disease by integrating mathematical modeling and pathological features of human brain  
219 organoids” describes a network-based drug-screening platform developed by integrating  
220 mathematical modeling and the pathological features of Alzheimer’s disease (AD) with  
221 human iPSC-derived cerebral organoids. Basic idea of this manuscript is a novel and  
222 interesting in developing drug-screening for Alzheimer’s disease.

223 However, authors should clearly describe their methods in construction of AD  
224 molecular network. <sup>[1]</sup>How did they narrow genes/proteins/phenotypes down to only 77  
225 genes/proteins/phenotypes? It appears to be an arbitrary choice. At least, AlzPathway  
226 consists of 1,347 species (genes and proteins) and 129 phenotypes. <sup>[2]</sup>Authors need to  
227 explain the reason why they focus on MAPK signaling pathway, WNT signaling  
228 pathway, and PI3K-AKT signaling pathway as molecular regulatory network of AD  
229 (**Fig. 4A**) which is a basis for network analysis in this manuscript. <sup>[3]</sup>By the way, **Fig.**  
230 **4A** is the correct figure? For example, Reelin has relationships with not only Apoer2 but  
231 also VLDLR and Apoptosis according to a logic table (**Supplementary Table 2**).

232 <sup>[4]</sup>Authors also should clearly describe their methods in analysis of the AD network  
233 model and identification of candidate drugs. For example, **Fig. 5A** illustrates up-  
234 regulated and down-regulated pathways according to their perturbation analysis, but  
235 they did not explain the definition of “up-regulated” and “down-regulated”  
236 pathways, and <sup>[5]</sup>they did not show their results of perturbation analysis. <sup>[6]</sup>Authors also  
237 should clearly describe their methods of attractor landscape analysis and unfortunately  
238 <sup>[7]</sup>attractor landscape drawn in **Figure 5B** is too small to see. <sup>[8]</sup>By the way, the idea of  
239 phenotype score is interesting to estimate the pathological level, but there are several  
240 concerns. Authors choose key proteins and phenotypes such as A $\beta$ , p-tau, synapse loss,  
241 apoptosis, and autophagy for calculation of phenotype score, but how to choose these  
242 key proteins and phenotypes? <sup>[9]</sup>Phenotype score looks work well but p-tau proteins  
243 have double impact on the score because p-tau activates synapse loss. They developed a  
244 network model but they did not consider these kinds of network effects in the  
245 calculation of phenotype score. If phenotype score well works to estimate the  
246 pathological level, <sup>[10]</sup>why did they need to develop a network model and conduct a  
247 perturbation analysis? Why don’t authors directly conduct the phenotype score  
248 calculation?

249 Basic idea of this manuscript is a novel and interesting in developing drug-screening for  
250 Alzheimer’s disease, but they need to clearly describe their methods and results.

251

252 **[COMMENT #1]**

253 How did they narrow genes/proteins/phenotypes down to only 77  
254 genes/proteins/phenotypes? It appears to be an arbitrary choice. At least, AlzPathway  
255 consists of 1,347 species (genes and proteins) and 129 phenotypes.

256 **[RESPONSE]**

257 The AlzPathway has various types of components (e.g. gene, protein, signaling pathway,  
258 *etc.*), so its components could not be directly used as nodes for the network model. For  
259 this reason, we used the AlzPathway for sorting out the list of signaling pathways. Of  
260 the components in the AlzPathway, only the signaling pathways of the neuron  
261 (indicated by ‘n\_’ prefix) were considered for the construction of the network model.  
262 These pathways were grouped into Notch, RELN, MAPK, Jak/Stat, Wnt, NR1/NR2R,  
263 Ca<sup>2+</sup>, TGFβ and mTOR (PI3K-AKT) signaling pathways. Among them, TGFβ signaling  
264 pathway related to microglia<sup>8</sup> was excluded. Based on these signaling pathway  
265 information, we searched for experimental studies in neuronal context to the best of our  
266 knowledge. By using this literature-based approach, we reconstructed simple regulatory  
267 links (i.e. activate or inactivate) and actual regulatory relationships such as update logic  
268 of node state (e.g. A node = B node AND C node) (**Supplementary Table 2**).

269

270 **[COMMENT #2]**

271 Authors need to explain the reason why they focus on MAPK signaling pathway, WNT  
272 signaling pathway, and PI3K-AKT signaling pathway as molecular regulatory network  
273 of AD (**Fig. 4a**) which is a basis for network analysis in this manuscript.

274 **[RESPONSE]**

275 In our study, we focused on APOE4, LPL-related signaling pathways in line with the  
276 experimental results in the main manuscript (**Fig. 2**). Through a literature-based  
277 approach, we constructed the model network primarily based on MAPK, Wnt, and  
278 mTOR signaling pathways<sup>9-11</sup>, and also considered other signaling pathways in the  
279 AlzPathway. We have added more explanation on the model construction in the revised  
280 manuscript (**line 608-612**).

281

282 **[COMMENT #3]**

283 By the way, **Fig. 4a** is the correct figure? For example, Reelin has relationships with not  
284 only Apoer2 but also VLDLR and Apoptosis according to a logic table  
285 (**Supplementary Table 2**).

286 **[RESPONSE]**

287 As the reviewer pointed out, there was a typographical error in **Fig. 4a** of the original  
288 manuscript. In the revised manuscript, we have corrected this and updated the figure for  
289 our Boolean model in accordance with the original logic table.

290

291 **[COMMENT #4 & 6]**

292 Authors also should clearly describe their methods in analysis of the AD network model  
293 and identification of candidate drugs. For example, **Fig. 5a** illustrates up-regulated and

294 down-regulated pathways according to their perturbation analysis, but they did not  
295 explain the definition of “up-regulated” and “down-regulated” pathways.

296 Authors also should clearly describe their methods of attractor landscape analysis

297 **[RESPONSE]**

298 As we described in the ‘Mathematical modeling’ section of ‘Methods’, attractor is a  
299 network state that represents a specific biological phenotype. Attractor landscape is the  
300 landscape of all attractors and the set of all states converging to each attractor (basin of  
301 attraction) in the state space of a given network model. Attractor landscape analysis  
302 enables quantitative evaluation of the network system by transforming complex  
303 dynamical properties of the network model into the states of convergence (attractors)  
304 and the converging propensity of initial states (basins). Using attractor landscape  
305 information, we can quantify node activities by averaging attractor states weighted by  
306 their basin sizes. In other words, attractor landscape analysis is a kind of procedure that  
307 can quantify node activities using attractor landscape information and further estimate  
308 the perturbation effect *in silico*. We have added the aforementioned description to  
309 ‘Attractor landscape analysis’ in ‘Methods’ of the revised manuscript (**line 633-641**).

310

311 The term ‘up-regulated’ and ‘down-regulated’ means the increase and decrease,  
312 respectively, of representative nodes (genes or proteins) for each signaling pathway. For  
313 instance, ‘up-regulated’ and ‘down-regulated’ correspond to the increase and decrease,  
314 respectively, of ERK node activity in case of the MAPK signaling pathway. The  
315 representative nodes for each signaling pathway are described on the right-side table of  
316 the **Supplementary Fig. 8**.

317

318 **[COMMENT #5]**

319 They did not show their results of perturbation analysis.

320 **[RESPONSE]**

321 The major perturbation analysis results used in the experiments (**Fig. 5**) were provided  
322 as a bar graph in the **Supplementary Fig. 10**. Other results could not be included in the  
323 Supplementary Dataset because the list of candidate targets is too long (e.g. the number  
324 of double perturbations:  ${}_{70}C_2=2,416$  cases). Instead, we provided the R-code for the  
325 perturbation analysis in the ‘Methods’ of the revised manuscript (**line 631-632**).

326

327 **[COMMENT #7]**

328 attractor landscape drawn in **Figure 5b** is too small to see.

329 **[RESPONSE]**

330 Following the reviewer’s comment, we have redrawn the ‘Attractor landscape’ in Fig. 5  
331 of the revised manuscript.

332 In the conceptual image of the ‘① Node perturbation’ box of **Fig. 5a**, each grey circle  
333 in ‘Attractor landscape’ represents network state, which is a collection of node states (1  
334 or 0). The black circle is the attractor to which all states within the basin of attraction

335 converge. The grey circles within the boundary of attractor A belong to the basin of A.  
336 The basin size of attractor A, which is the number of grey circles in the basin of A, is  
337 larger than the basin size of attractor B.  
338

339 **[COMMENT #8]**

340 By the way, the idea of phenotype score is interesting to estimate the pathological level,  
341 but there are several concerns. Authors choose key proteins and phenotypes such as A $\beta$ ,  
342 p-tau, synapse loss, apoptosis, and autophagy for calculation of phenotype score, but  
343 how to choose these key proteins and phenotypes?

344 **[RESPONSE]**

345 The reasons why we chose A $\beta$ , p-tau, neuron loss, synapse loss, and autophagy as key  
346 proteins and phenotypes are as follows. First, because A $\beta$  and p-tau are the well-known  
347 biological markers of Alzheimer's disease, they were chosen as the target proteins the  
348 expression levels of which should be decreased. Second, the goal of our study is to  
349 identify an optimal target that can decrease the neuron/synapse loss, which is associated  
350 with the cognitive impairment in Alzheimer's disease, by analyzing the network model.  
351 Third, based on previous findings that the degradation of autophagy function increases  
352 accumulation of A $\beta$ , we included autophagy as a key phenotype<sup>12,13</sup>. Choosing  
353 autophagy as a key phenotype helps to understand whether the accumulation  
354 mechanism of A $\beta$  is due to an increase of A $\beta$  production or a decrease in autophagy  
355 function. For these reasons, we chose A $\beta$ , p-tau, neuron loss, synapse loss, and  
356 autophagy as key proteins and phenotypes in this study.

357 As we described in the 'Analysis of the AD network model and identification of  
358 candidate drugs' part of 'Results', we calculated the phenotype score using the key  
359 proteins and phenotypes' node activities obtained from attractor landscape analysis of  
360 our network model. Therefore, simulation of the network model is a prerequisite to  
361 obtain the phenotype score. In the network model with a given genetic condition (e.g.  
362 APOE4, LPL), we can identify which node contributes to producing a desirable  
363 phenotype score using the node perturbation analysis as described in 'Result' of the  
364 main manuscript. The desirable phenotype score refers to the case where the activities  
365 of the pathological proteins and phenotypes are low. Hence, both perturbation analysis  
366 and calculation of the phenotype score are required to find the optimal target(s) for a  
367 given genetic condition.

368

369 **[COMMENT #9]**

370 Phenotype score looks work well but p-tau proteins have double impact on the score  
371 because p-tau activates synapse loss. They developed a network model but they did not  
372 consider these kinds of network effects in the calculation of phenotype score.

373 **[RESPONSE]**

374 Although there is a positive link from 'p-tau' to 'Synapse loss', activation of 'p-tau'  
375 alone cannot satisfy the sufficient condition for activating 'Synapse loss' according to

376 its update logic; (synapse\_loss = (Cofilin | tau\_p) & !(BDNF | CREB)). For this reason,  
377 there is no double impact of 'p-tau' on the phenotype score.  
378



379 **Response to the specific comments of Reviewer 3:**

380

381 **[COMMENT #1]**

382 Data presented in **Figure 3**. Localization of the plaques could be clearer, especially the  
383 subcellular localization. Perhaps could be complemented by alternate imaging methods  
384 that show this key property of the model at higher resolution

385 **[RESPONSE]**

386 As the reviewer suggested, we have tried imaging brain organoid sections in higher  
387 resolution (40X) with Zeiss LSM 700 (**Supplementary Fig. 5, line 192-196**). The  
388 images clearly show that amyloid-beta aggregates are formed in extracellular interstitial  
389 spaces, and hyper-phosphorylated tau co-localizes intracellularly along with neuronal  
390 marker MAP2. As sites of amyloid deposition and tau hyper-phosphorylation do not  
391 always overlap, it is indefinite to conclude by a single image that levels of pathogenic  
392 protein differ significantly between two groups. Thus, we used a total of 64 organoid  
393 sections from 6 individual lines (CN1, CN5, AD4, AD5, E3<sup>par</sup>, E4<sup>iso</sup>) that came from  
394 various Z-positions of an organoid to reflect diverse regions of a three-dimensional (3D)  
395 object. In accordance with the main results, two-dimensional (2D)  
396 immunohistochemistry images show that amyloid-beta and p-tau immunoreactivity was  
397 significantly increased in PiB positive group compared to the negative group. Also,  
398 isogenic E4 organoids retained higher levels of amyloid-beta and p-tau compared to the  
399 parental E3 line. Even though we have used many samples for quantification, 2D  
400 segmentalization of a 3D object could introduce unintentional bias where some regions  
401 are over-represented. This was the foremost reason we used 3D tissue clearing  
402 technology and ImageXpress Micro Confocal system to image organoids and measure  
403 pathogenic protein levels as it provides a holistic view on an entire organoid.

404

405 **[COMMENT #2]**

406 Data presented in **Figure 4**. Potentially move oxidative stress validation to  
407 supplemental.

408 **[RESPONSE]**

409 The data presented in **Fig. 4** show the molecular regulatory network model of  
410 Alzheimer's disease and its validation for different oxidative stress levels. Following the  
411 reviewer's comment, we have repositioned previous **Fig. 4c to Supplementary Fig. 9**  
412 (the result of enriched pathway analysis) to Supplementary data of the revised  
413 manuscript. Since validation of network model is as important as building the model in  
414 Boolean/logical modeling studies<sup>14</sup>, we have kept **Fig. 4b** to show essential input-output  
415 relationships of the network model in the revised manuscript.

416

417 **[COMMENT #3]**

418 Data presented in **Figure 6**. Park et al. tested FDA-approved drugs on both LPLA288T  
419 SNP PiB+ iCOs and E4iso iCOs as a validation of their network-based drug screening

420 platform. Results of the validation experiments were not entirely conclusive due in part  
421 to lack of a clear dose-dependent relationship. These results therefore would require  
422 further validation, potentially by testing with more replicates and in the other cell lines.  
423 Drug testing was not performed on PiB<sup>+</sup> iCOs that contain the ApoE ε4 allele. In  
424 addition to LPLA288T SNP PiB<sup>+</sup> iCOs only representing a small subset of the iCOs  
425 used in this study as this SNP is not present in other PiB<sup>+</sup> iCOs, these iCOs also do not  
426 carry the ApoE ε4 allele. Furthermore, although E4<sup>iso</sup> iCOs were used for drug testing,  
427 they are not derived from AD patient iPSCs. Thus, to properly validate their model for  
428 precision medicine applications, FDA-approved drugs need to also be tested on PiB<sup>+</sup>  
429 iCOs that carry the ApoE ε4 allele. These COs better represent the genetic background  
430 of human sporadic AD patients than E4<sup>iso</sup> iCOs, while also carrying the ApoE ε4 allele  
431 missing in the LPLA288T SNP PiB<sup>+</sup> iCOs.

432 **[RESPONSE]**

433 We totally agree with that. As the reviewer suggested, we further performed drug test  
434 by using the iCOs from PiB<sup>+</sup> carrying the ApoE ε4 allele (PiB<sup>+</sup> #5 iCOs). We added this  
435 result in **Fig. 6d** (We also changed graph types in **Fig. 6** in order that the medicinal  
436 effects can be seen well at a glance). Some interpretations are as follows:

437 i) Most of the drugs showed better efficacy in reducing A $\beta$  and tau deposition as their  
438 concentration increased, except for the ‘Astaxanthin’ and ‘Everolimus with 1 uM  
439 Flibanserin’. ii) PiB<sup>+</sup> #5 iCOs showed better drug effectiveness on the A $\beta$  reduction  
440 than E4<sup>iso</sup> iCOs. One possibility is that it is because PiB<sup>+</sup> #5 iCOs are basically derived  
441 from sporadic AD participants, but E4<sup>iso</sup> iCOs are not although we cannot rule out the  
442 possibility of difference on genetic background from each patient. iii) Similar to E4<sup>iso</sup>  
443 iCOs, the combinative therapy using Flibanserin with Ripasudil worked best when  
444 compared to other drugs.

445 Although, the tendency from PiB<sup>+</sup> #5 iCOs is not exactly matched with E4<sup>iso</sup> iCOs, it is  
446 obvious that most of the drugs had effectiveness on the reduction of A $\beta$  and tau.  
447 Furthermore, we think it is quite natural because PiB<sup>+</sup> #5 iCOs are basically derived  
448 from sporadic AD participants, but E4<sup>iso</sup> iCOs are not, as mentioned above. Therefore,  
449 these results indicate that we validated our network-based drug-screening platform by  
450 integrating mathematical modeling and pathological traits of human iCOs.

451

452 **[COMMENT #4]**

453 While I appreciate the unique aspect the mathematical model brings to the paper, I also  
454 felt the flow of the paper would be much improved if this was more concisely  
455 summarized in the main text.

456 **[RESPONSE]**

457 We have modified our discussion section (**line 330-340**) and results section (**line 200-**  
458 **202, line 212-220**) to make it clearer as you recommended.

459

460 **Response to the specific comments of Reviewer 4:**

461

462 **[COMMENT #1]**

463 One limitation is that the data comes from only 11 participants. The data for these  
464 subjects may not be representative for the overall population of sporadic AD patients,  
465 and subject-specific idiosyncrasies in the data that are not disease-relevant could lead to  
466 errors in the transcriptome-based network model and perturbation analysis. The authors  
467 mention that they aim at a personalized precision medicine approach, but the distinction  
468 between disease-associated biological variance and other sources of variance in the data  
469 is still an issue with small numbers of subjects, and small numbers of RNA-seq  
470 experiments limiting the statistical power, in particular for the transcriptome-derived  
471 network analysis. It is therefore recommended to compare the data against larger public  
472 iPSC data for AD, e.g. derived from the GEO database for the transcriptomic analyses.

473 **[RESPONSE]**

474 As reviewer suggested, we have tried to compare our transcriptome data to the public  
475 GEO database (**Supplementary Fig. 4, line 164-175, line 595-599**). It is not possible to  
476 find public iPSC- derived brain organoid data for AD, but we found a public iPSC-  
477 derived neuron data (PIN) for AD (Accession number: GSE143951, Platform number:  
478 GPL16043) and public human AD brain data (PHB) (Accession number: GSE109887,  
479 Platform number: GPL10904) (**Supplementary Fig. 4a-4b**). We compared PHB GO  
480 data from Toppgene DB (<https://toppgene.cchmc.org>) to PIN or our own transcriptome  
481 data, to reveal that our transcriptome data from human iCOs is more similar to PHB  
482 than PIN. We performed GO similarity analysis to identify how many GO terms  
483 overlapped each other. We used three GO sub-ontologies (CC, cellular components; BP,  
484 biological processes; MF, molecular functions) (cut-off, FDR- corrected p-value < 0.05).  
485 Interestingly, our own transcriptome data had dramatically high GO similarity to PHB  
486 (CC, 64.9% for PiB iCOs and 76.5% for E4 iCOs; BP, 58.7% for PiB iCOs and 26.0%  
487 for E4 iCOs; MF, 46.7% for PiB iCOs and 29.4% for E4 iCOs), whereas PIN had low  
488 GO similarity to PHB (CC, 7.0% for PIN; BP, 4.2% for PIN; MF, 8.3% for PIN)  
489 (**Supplementary Fig. 4c**). Specifically, we have tried to confirm that our significant GO  
490 terms (**Fig. 2i**) are also included in PHB or PIN. Most of the GO terms were also  
491 included as significant terms in PHB (21/28, 75%), but not in PIN (6/28, 21%)  
492 (**Supplementary Fig. 4d**). Therefore, we concluded that our own transcriptome data is  
493 closer to the real human brain transcriptome data.

494

495 **[COMMENT #2]**

496 It is not clear whether the p-values that were used to define the differentially expressed  
497 genes (DEGs) were adjusted for multiple hypothesis testing. Using a relaxed p-value  
498 cut-off for the pathway analysis ( $-\log_{10}(\text{p-value}) > 1$ , corresponding to a p-value cut-off  
499 of 0.1) can be justified by taking into consideration that pathways with an enrichment of  
500 many small, close-to-significant alterations are likely disease-relevant. However, since

501 the authors do not only aim at ranking GO processes, but also at identifying individual  
502 drug target genes, a false-discovery-rate (FDR) above 10% for individual genes would  
503 lead to too many errors (in particular, if the authors did not use FDR-adjusted p-values,  
504 but nominal p-values). Therefore, FDR corrected p-values should be used for all  
505 analyses that rely on the significance of individual gene alterations.

506 **[RESPONSE]**

507 Thank you for the critical comment. It needs to be clarified that different correction  
508 strategies were adopted for each RNA-seq analysis.

509 First, we already applied the FDR corrected p-values for the validation of mathematical  
510 model and identification of individual drug target genes (**Fig. 5b and Supplementary**  
511 **Fig. 8,9**). We have mentioned this in the legend of **Supplementary Fig. 8**.

512 Second, to demonstrate that gene expression profiles (GO analysis) differ between PiB<sup>-</sup>  
513 and PiB<sup>+</sup> groups (**Fig 2i and Supplementary Fig 2a, c, f**), we subjected five samples  
514 from each group, performed RNA-seq on each sample and compared gene expression  
515 profiles (GO analysis) by using the selected DEGs. For this specific analysis, we did not  
516 apply multiple correction for the selection of DEGs because we intended to be more  
517 inclusive in documenting subtle differences in gene expression changes, as the reviewer  
518 pointed out. However, since we had not applied FDR correction, even for the GO  
519 analysis deriving significant GO terms from the selected DEGs, we have changed p-  
520 values to FDR- adjusted p-values (**Fig 2i and Supplementary Fig. 3**). We have  
521 mentioned this in the legend of **Fig 2 and Supplementary Fig. 3**

522 Regarding the reviewer's comment, we have also clearly mentioned it in **Methods**  
523 section (**line 592-595, line 600-603**), please refer to the **Methods** section.

524

525 **[COMMENT #3]**

526 The authors state that the pre-selected network consists of 77 nodes and 203 links.  
527 While these nodes representing mainly genes/proteins from KEGG and AlzPathway  
528 definitely play important roles in AD, a significantly larger number of genes/proteins  
529 will likely be relevant for AD than this pre-filtered subset, and the restriction to mostly  
530 KEGG/AlzPathway-derived nodes may bias the results towards target genes in these  
531 pathways that are already well-known and whose associated drugs therefore have  
532 limited novelty. A possibility to avoid this limitation is to use a pathway-agnostic  
533 network analysis (e.g. using a genome-scale network from the STRING web-service or  
534 other public resources for genome-scale gene regulatory or protein interaction networks)  
535 to identify network clusters of transcriptomic alterations, which are not already captured  
536 by the known pathway definitions.

537 **[RESPONSE]**

538 The AlzPathway has various types of components (e.g. gene, protein, signaling pathway,  
539 *etc.*), so its components could not be directly used as nodes for the network model. For  
540 this reason, we used the AlzPathway for sorting out the relevant signaling pathway lists.  
541 Of the components in the AlzPathway, only the signaling pathways of the neuron

542 (indicated by ‘n\_’ prefix) were considered for the construction of the network model.  
543 These pathways were grouped into Notch, RELN, MAPK, Jak/Stat, Wnt, NR1/NR2R,  
544 Ca<sup>2+</sup>, TGFβ and mTOR (PI3K-AKT) signaling pathways. Among them, TGFβ signaling  
545 pathway related to microglia was excluded.

546 Based on these signaling pathway information, we searched for experimental studies  
547 only in neuronal context to the best of our knowledge. By using this literature-based  
548 approach, we reconstructed simple regulatory links (i.e. activate or inactivate) and  
549 actual regulatory relationships such as update logic of node state (e.g. A node = B node  
550 AND C node) (**Supplementary Table 2**).

551 In our study, we focused on APOE4, LPL-related signaling pathways in line with the  
552 experimental results in the main manuscript (**Fig. 2**). Through a literature-based  
553 approach, we constructed the model network primarily based on MAPK, Wnt, and  
554 mTOR signaling pathways<sup>9-11</sup>, and also considered other signaling pathways in the  
555 AlzPathway. We have added more explanation to the model construction in the revised  
556 manuscript (**line 608-612**).

557 The purposes of our study are as follows: 1) to understand complex dynamical  
558 properties of the regulatory network, which cannot be done by simple correlation  
559 analysis among the network components, and 2) to identify optimal candidate targets for  
560 each genetic condition based on quantitative dynamical analysis of the regulatory  
561 network model. As the reviewer pointed out, pathway-agnostic network analysis may  
562 have benefits in finding novel targets. However, since we aim to find the optimal targets  
563 for a given genetic condition rather than to find novel targets, the proposed approach  
564 does not fit our research objectives. Also, public resources such as STRING contain  
565 collective information from various cell-types, so we considered that such kinds of  
566 resources might not be suitable for constructing our neuron-specific network model.  
567 Nevertheless, the reviewer’s comment will be very helpful in our future study to find  
568 out novel targets by further extending our network model to include diverse genetic risk  
569 factors and components. We appreciate the reviewer’s valuable comment in this respect.

570

#### 571 **[COMMENT #4]**

572 To show that the mathematical modeling / network analysis provides a significant added  
573 value beyond the compound filtering obtained from the network model pre-selection of  
574 77 nodes and the BBB-filter, it would be useful to compare the ranked target and  
575 compound lists with and without the additional network analysis (e.g. testing whether  
576 there is an improved enrichment of known AD protein drug targets, such as BACE1,  
577 MAOB, MAPT etc., that have been considered in AD clinical trials, in the network  
578 analysis derived ranking list).

#### 579 **[RESPONSE]**

580 There were several network analysis studies that constructed gene or protein interaction  
581 networks using databases such as the STRING and found network clusters/modules of  
582 transcriptomic alterations that are significantly related to diseases. However, the data

583 used in these studies contained information of various cell types, such as neuron,  
584 microglia, astrocyte, *etc.* So, we considered that such kinds of resources might not be  
585 suitable for constructing our neuron-specific network model. In addition, the results  
586 obtained by pathway-agnostic analysis mostly suggested microglia-related components  
587 as targets<sup>15</sup>, so the target list that can be obtained from the pathway-agnostic analysis  
588 would be inappropriate for our research objectives.

589 We also curated drug targets under clinical trial from the research conducted by  
590 Cummings J. et al.,<sup>16</sup> and took only those included in our model;  $\alpha$ -secretase, NMDAR,  
591 MAPT, p38 MAPK-  $\alpha$ , APP, PP2B, PPAR- $\gamma$ . The activities of these nodes were  
592 changed in the direction of beneficial propensity when we perturbed the high phenotype  
593 score targets in our network model. Furthermore, our approach has the advantage of  
594 logical modeling, which allows us to understand the underlying mechanism of the  
595 disease, at the molecular regulatory network level, that occurs differently depending on  
596 genetic conditions (even with the same pathological phenotype), and thus to explore  
597 optimal drug target candidates for each genetic condition.

598  
599  
600

601 [References]

602

- 603 1. Lin, Y.T., *et al.* APOE4 Causes Widespread Molecular and Cellular  
604 Alterations Associated with Alzheimer's Disease Phenotypes in Human  
605 iPSC-Derived Brain Cell Types. *Neuron* **98**, 1141-1154 e1147 (2018).
- 606 2. Karch, C.M. & Goate, A.M. Alzheimer's disease risk genes and  
607 mechanisms of disease pathogenesis. *Biol Psychiatry* **77**, 43-51 (2015).
- 608 3. Chen, Z. & Zhong, C. Oxidative stress in Alzheimer's disease. *Neurosci*  
609 *Bull* **30**, 271-281 (2014).
- 610 4. Goldstein, A.S., *et al.* Assessing the Effects of Ripasudil, a Novel Rho  
611 Kinase Inhibitor, on Human Corneal Endothelial Cell Health. *J Ocul*  
612 *Pharmacol Ther* (2018).
- 613 5. Okumura, N., *et al.* Effect of the Rho-Associated Kinase Inhibitor Eye  
614 Drop (Ripasudil) on Corneal Endothelial Wound Healing. *Invest*  
615 *Ophthalmol Vis Sci* **57**, 1284-1292 (2016).
- 616 6. Fejes, Z., *et al.* Endothelial cell activation is attenuated by everolimus  
617 via transcriptional and post-transcriptional regulatory mechanisms  
618 after drug-eluting coronary stenting. *PLoS One* **13**, e0197890 (2018).
- 619 7. Nayman, A.H., *et al.* Dual-Inhibition of mTOR and Bcl-2 Enhances the  
620 Anti-tumor Effect of Everolimus against Renal Cell Carcinoma In Vitro  
621 and In Vivo. *J Cancer* **10**, 1466-1478 (2019).
- 622 8. Yuan, C., *et al.* The age-related microglial transformation in Alzheimer's  
623 disease pathogenesis. *Neurobiol Aging* **92**, 82-91 (2020).
- 624 9. Huang, Y.A., Zhou, B., Wernig, M. & Sudhof, T.C. ApoE2, ApoE3, and  
625 ApoE4 Differentially Stimulate APP Transcription and Abeta Secretion.  
626 *Cell* **168**, 427-441 e421 (2017).
- 627 10. Lane-Donovan, C. & Herz, J. ApoE, ApoE Receptors, and the Synapse  
628 in Alzheimer's Disease. *Trends Endocrinol Metab* **28**, 273-284 (2017).
- 629 11. Menzies, F.M., *et al.* Autophagy and Neurodegeneration: Pathogenic  
630 Mechanisms and Therapeutic Opportunities. *Neuron* **93**, 1015-1034  
631 (2017).
- 632 12. Mawuenyega, K.G., *et al.* Decreased clearance of CNS beta-amyloid in

- 633 Alzheimer's disease. *Science* **330**, 1774 (2010).
- 634 13. Lipinski, M.M., *et al.* Genome-wide analysis reveals mechanisms  
635 modulating autophagy in normal brain aging and in Alzheimer's  
636 disease. *Proc Natl Acad Sci U S A* **107**, 14164-14169 (2010).
- 637 14. Abou-Jaoude, W., *et al.* Logical Modeling and Dynamical Analysis of  
638 Cellular Networks. *Front Genet* **7**, 94 (2016).
- 639 15. Mostafavi, S., *et al.* A molecular network of the aging human brain  
640 provides insights into the pathology and cognitive decline of  
641 Alzheimer's disease. *Nat Neurosci* **21**, 811-819 (2018).
- 642 16. Cummings, J., Lee, G., Ritter, A., Sabbagh, M. & Zhong, K. Alzheimer's  
643 disease drug development pipeline: 2020. *Alzheimers Dement (N Y)* **6**,  
644 e12050 (2020).
- 645



Reviewers' Comments:

Reviewer #1:

Remarks to the Author:

I think this is a strong manuscript and worthy publishing in Nature Communications. The authors did an excellent job addressing my comments, as well as the suggestions of the other reviewers.

Reviewer #2:

None

Reviewer #3:

Remarks to the Author:

The authors' revised manuscript has incorporated significant changes, including the addition of new data, that sufficiently address our initial concerns and recommended improvements. In addition to imaging iCO sections at higher resolution to show clearer subcellular localization of amyloid beta plaques and phosphorylated tau, the authors also utilize various Z-positions to compare pathogenic protein levels between different iCO groups. Furthermore, the authors have also included suggestions to test drug compounds on PiB+ iCOs that contain the ApoE allele, as this better reflects the genetic background of sporadic AD patients.

The combination of this new data as well as modifying the graph type in figure 6 to show a clearer dose-dependent relationship strengthens the validation of their network-based drug-screening platform for AD.

Reviewer #4:

Remarks to the Author:

Thanks for considering some of the suggestions in the revision of the manuscript. Although my principle concerns related to limitations of the study with respect to statistical power and the constraints of using a limited subset of 77 pre-selected nodes still remain, I do think that the study is worth publishing. I still have the concern that if you go in with a highly selected sub-network and use it as a constraint, you come out with output nodes that have already been validated to a certain extent and the novelty is limited.

Nevertheless, the combination of using a network-based filtering approach and the use of larger scale cerebral organoids (e.g. with and without the ApoE4-allele or ROS challenges) apparently is able to at least support the selection of potentially useful existing drugs. The system might also provide hints for prioritizing drug candidates for further mechanistic and clinical evaluation.

The main impact of the study might be the motivation for the field to combine network based-based and other computational approaches with the iPSC-derived organoid technology, allowing both, in-silico as well as experimental genetic and environmental perturbation studies. In that sense the study will probably have a positive impact on a number of organoid applications.

## REVIEWERS' COMMENTS

Reviewer #1 (Remarks to the Author):

I think this is a strong manuscript and worthy publishing in Nature Communications. The authors did an excellent job addressing my comments, as well as the suggestions of the other reviewers.

Reviewer #3 (Remarks to the Author):

The authors' revised manuscript has incorporated significant changes, including the addition of new data, that sufficiently address our initial concerns and recommended improvements. In addition to imaging iCO sections at higher resolution to show clearer subcellular localization of amyloid beta plaques and phosphorylated tau, the authors also utilize various Z-positions to compare pathogenic protein levels between different iCO groups. Furthermore, the authors have also included suggestions to test drug compounds on PiB<sup>+</sup> iCOs that contain the ApoE allele, as this better reflects the genetic background of sporadic AD patients.

The combination of this new data as well as modifying the graph type in figure 6 to show a clearer dose-dependent relationship strengthens the validation of their network-based drug-screening platform for AD.

Reviewer #4 (Remarks to the Author):

Thanks for considering some of the suggestions in the revision of the manuscript. Although my principle concerns related to limitations of the study with respect to statistical power and the constraints of using a limited subset of 77 pre-selected nodes still remain, I do think that the study is worth publishing. I still have the concern that if you go in with a highly selected sub-network and use it as a constraint, you come out with output nodes that have already been validated to a certain extent and the novelty is limited.

Nevertheless, the combination of using a network-based filtering approach and the use of larger scale cerebral organoids (e.g. with and without the ApoE4-allele or ROS challenges) apparently is able to at least support the selection of potentially useful existing drugs. The system might also provide hints for prioritizing drug candidates for further mechanistic and clinical evaluation.

The main impact of the study might be the motivation for the field to combine network based-based and other computational approaches with the iPSC-derived organoid technology, allowing both, in-silico as well as experimental genetic and environmental perturbation studies. In that sense the study will probably have a positive impact on a number of organoid applications.

**→ Thank you very much for the Reviewers' kind words and great additional comments. We also agree with the comment from Reviewer #4, therefore, we will proceed to build an advanced model of data-driven using more experimental data in the future. Thank you very much again for your nice comments so far.**
